# Supplementary material for: Association of Early Norepinephrine Administration With 24-Hour Mortality Among Patients With Blunt Trauma and Hemorrhagic Shock
Source: PubMed Central journal article supplement (PMC9547317; doi:10.1001/jamanetworkopen.2022.34258), 2022-10-07
Supplement: jamanetwopen-e2234258-s002.pdf [file jamanetwopen-e2234258-s002.pdf]

| <b>*Group Name(s): French Trauma Research Initiative</b> |                    |                              |                         |                                        |                                        |                |                                                                |                                                                                                   |  |  |  |  |  |  |  |
|----------------------------------------------------------|--------------------|------------------------------|-------------------------|----------------------------------------|----------------------------------------|----------------|----------------------------------------------------------------|---------------------------------------------------------------------------------------------------|--|--|--|--|--|--|--|
| <b>*First Name and Middle Initial(s)</b>                 | <b>*Last Name</b>  | <b>*Suffix (eg, Jr, III)</b> | <b>Academic Degrees</b> | <b>Institution</b>                     | <b>Location (city, state/province)</b> | <b>Country</b> | <b>Role or Contribution, eg, chair, principal investigator</b> | <b>Group (if more than 1 Group listed in the byline) and/or Subgroup (eg, Steering Committee)</b> |  |  |  |  |  |  |  |
| François                                                 | Albasini           |                              | Dr                      | CH Saint Jean de Maurienne             | Saint Jean de Maurienne                | France         | clinical investigator                                          | Trauma System of the Northern French Alps Emergency Network (TRENAU)                              |  |  |  |  |  |  |  |
| Olivier                                                  | Briot              |                              | Dr                      | CH Briançon                            | Briançon                               | France         | clinical investigator                                          | Trauma System of the Northern French Alps Emergency Network (TRENAU)                              |  |  |  |  |  |  |  |
| Laurent                                                  | Chaboud            |                              | Dr                      | CH Albertville Moutiers                | Albertville                            | France         | clinical investigator                                          | Trauma System of the Northern French Alps Emergency Network (TRENAU)                              |  |  |  |  |  |  |  |
| Sophie                                                   | Chateigner Coelsch |                              | Dr                      | CH Bourg Saint Maurice                 | Bourg Saint Maurice                    | France         | clinical investigator                                          | Trauma System of the Northern French Alps Emergency Network (TRENAU)                              |  |  |  |  |  |  |  |
| Alexandre                                                | Chaumat            |                              | Dr                      | CH Annecy Genevois                     | Annecy                                 | France         | clinical investigator                                          | Trauma System of the Northern French Alps Emergency Network (TRENAU)                              |  |  |  |  |  |  |  |
| Thomas                                                   | Comlar             |                              | Dr                      | CH Métropole Savoie                    | Chambery                               | France         | clinical investigator                                          | Trauma System of the Northern French Alps Emergency Network (TRENAU)                              |  |  |  |  |  |  |  |
| Olivier                                                  | Debas              |                              | Dr                      | CH Docteur Recamier – Belley           | Belley                                 | France         | clinical investigator                                          | Trauma System of the Northern French Alps Emergency Network (TRENAU)                              |  |  |  |  |  |  |  |
| Guillaume                                                | Debaty             |                              | Dr                      | CHU Grenoble Alpes                     | Grenoble                               | France         | clinical investigator                                          | Trauma System of the Northern French Alps Emergency Network (TRENAU)                              |  |  |  |  |  |  |  |
| Emmanuelle                                               | Dupré-Nalet        |                              | Dr                      | CH Alpes Léman                         | Contamine sur Arve                     | France         | clinical investigator                                          | Trauma System of the Northern French Alps Emergency Network (TRENAU)                              |  |  |  |  |  |  |  |
| Samuel                                                   | Gay                |                              | Dr                      | CH Annecy Genevois                     | Annecy                                 | France         | clinical investigator                                          | Trauma System of the Northern French Alps Emergency Network (TRENAU)                              |  |  |  |  |  |  |  |
| Edouard                                                  | Ginestie           |                              | Dr                      | CHI des Alpes du Sud – Gap             | Gap                                    | France         | clinical investigator                                          | Trauma System of the Northern French Alps Emergency Network (TRENAU)                              |  |  |  |  |  |  |  |
| Edouard                                                  | Girard             |                              | Dr                      | CHU Grenoble Alpes                     | Grenoble                               | France         | clinical investigator                                          | Trauma System of the Northern French Alps Emergency Network (TRENAU)                              |  |  |  |  |  |  |  |
| Jules                                                    | Grèze              |                              | Dr                      | CHU Grenoble Alpes                     | Grenoble                               | France         | clinical investigator                                          | Trauma System of the Northern French Alps Emergency Network (TRENAU)                              |  |  |  |  |  |  |  |
| Marc                                                     | Haesevoets         |                              | Dr                      | CH Albertville Moutiers                | Albertville                            | France         | clinical investigator                                          | Trauma System of the Northern French Alps Emergency Network (TRENAU)                              |  |  |  |  |  |  |  |
| Marie                                                    | Hallain            |                              | Dr                      | CHI Les Hôpitaux du Pays du Mont Blanc | Sallanches                             | France         | clinical investigator                                          | Trauma System of the Northern French Alps Emergency Network (TRENAU)                              |  |  |  |  |  |  |  |
| Etienne                                                  | Haller             |                              | Dr                      | CH Saint Jean de Maurienne             | Saint Jean de Maurienne                | France         | clinical investigator                                          | Trauma System of the Northern French Alps Emergency Network (TRENAU)                              |  |  |  |  |  |  |  |
| Christophe                                               | Hoareau            |                              | Dr                      | CH Bourg Saint Maurice                 | Bourg Saint Maurice                    | France         | clinical investigator                                          | Trauma System of the Northern French Alps Emergency Network (TRENAU)                              |  |  |  |  |  |  |  |
| Bernard                                                  | Lanaspre           |                              | Dr                      | CH Les Escartons – Briançon            | Briançon                               | France         | clinical investigator                                          | Trauma System of the Northern French Alps Emergency Network (TRENAU)                              |  |  |  |  |  |  |  |
| Safia                                                    | Lespinasse         |                              | Dr                      | CH Pierre Bazin – Voiron               | Voiron                                 | France         | clinical investigator                                          | Trauma System of the Northern French Alps Emergency Network (TRENAU)                              |  |  |  |  |  |  |  |
| Albrice                                                  | Levrat             |                              | Dr                      | CH Annecy Genevois                     | Annecy                                 | France         | clinical investigator                                          | Trauma System of the Northern French Alps Emergency Network (TRENAU)                              |  |  |  |  |  |  |  |
| Romain                                                   | Mermillod-Blondin  |                              | Dr                      | CH Annecy Genevois                     | Annecy                                 | France         | clinical investigator                                          | Trauma System of the Northern French Alps Emergency Network (TRENAU)                              |  |  |  |  |  |  |  |
| Philippe                                                 | Nicoud             |                              | Dr                      | Les Hôpitaux du Léman – Thonon         | Thonon                                 | France         | clinical investigator                                          | Trauma System of the Northern French Alps Emergency Network (TRENAU)                              |  |  |  |  |  |  |  |
| Elisabeth                                                | Rancurel           |                              | Dr                      | CHU Grenoble Alpes                     | Grenoble                               | France         | clinical investigator                                          | Trauma System of the Northern French Alps Emergency Network (TRENAU)                              |  |  |  |  |  |  |  |
| Jean-Marc                                                | Thouret            |                              | Dr                      | CH Métropole Savoie                    | Chambery                               | France         | clinical investigator                                          | Trauma System of the Northern French Alps Emergency Network (TRENAU)                              |  |  |  |  |  |  |  |
| Claire                                                   | Vallenet           |                              | Dr                      | CH Alpes Léman                         | Contamine sur Arve                     | France         | clinical investigator                                          | Trauma System of the Northern French Alps Emergency Network (TRENAU)                              |  |  |  |  |  |  |  |
| Cécile                                                   | Vallot             |                              | Dr                      | CH Annecy Genevois                     | Annecy                                 | France         | clinical investigator                                          | Trauma System of the Northern French Alps Emergency Network (TRENAU)                              |  |  |  |  |  |  |  |
| Bénédicte                                                | Zerr               |                              | Dr                      | CH Métropole Savoie                    | Chambery                               | France         | clinical investigator                                          | Trauma System of the Northern French Alps Emergency Network (TRENAU)                              |  |  |  |  |  |  |  |
| Paér-Sélim                                               | Abback             |                              | Dr                      | Tours University Hospital              | Tours                                  | France         | clinical investigator                                          | TraumaBase Group                                                                                  |  |  |  |  |  |  |  |
| Gérard                                                   | Audibert           |                              | Dr                      | Nancy University Hospital              | Nancy                                  | France         | clinical investigator                                          | TraumaBase Group                                                                                  |  |  |  |  |  |  |  |
| Mathieu                                                  | Boutonnet          |                              | Dr                      | Percy Army Hospital                    | Clamart                                | France         | clinical investigator                                          | TraumaBase Group                                                                                  |  |  |  |  |  |  |  |
| Thomas                                                   | Clavier            |                              | Dr                      | Rouen University Hospital              | Rouen                                  | France         | clinical investigator                                          | TraumaBase Group                                                                                  |  |  |  |  |  |  |  |
| Fabrice                                                  | Cook               |                              | Dr                      | Cayenne General Hospital               | Cayenne                                | France         | clinical investigator                                          | TraumaBase Group                                                                                  |  |  |  |  |  |  |  |
| Mohamed                                                  | Eljamri            |                              | Dr                      | Hospital Group Séléstat Obernai        | Séléstat                               | France         | clinical investigator                                          | TraumaBase Group                                                                                  |  |  |  |  |  |  |  |
| Thierry                                                  | Floch              |                              | Dr                      | Reims University Hospital              | Reims                                  | France         | clinical investigator                                          | TraumaBase Group                                                                                  |  |  |  |  |  |  |  |
| Elisabeth                                                | Gaertner           |                              | Dr                      | Colmar Hospital                        | Colmar                                 | France         | clinical investigator                                          | TraumaBase Group                                                                                  |  |  |  |  |  |  |  |
| Delphine                                                 | Garrigue           |                              | Dr                      | Lille University Hospital              | Lille                                  | France         | clinical investigator                                          | TraumaBase Group                                                                                  |  |  |  |  |  |  |  |
| Thomas                                                   | Geeraerts          |                              | Dr                      | Toulouse University Hospital           | Toulouse                               | France         | clinical investigator                                          | TraumaBase Group                                                                                  |  |  |  |  |  |  |  |
| Sebastien                                                | Gette              |                              | Dr                      | Regional Hospital Metz-Thionville      | Metz                                   | France         | clinical investigator                                          | TraumaBase Group                                                                                  |  |  |  |  |  |  |  |
| Anne                                                     | Godier             |                              | Dr                      | Georges Pompidou University Hospital   | Paris                                  | France         | clinical investigator                                          | TraumaBase Group                                                                                  |  |  |  |  |  |  |  |
| Pierre                                                   | Gosset             |                              | Dr                      | Amiens University Hospital             | Amiens                                 | France         | clinical investigator                                          | TraumaBase Group                                                                                  |  |  |  |  |  |  |  |
| Jean-Luc                                                 | Hanouz             |                              | Dr                      | Caen University Hospital               | Caen                                   | France         | clinical investigator                                          | TraumaBase Group                                                                                  |  |  |  |  |  |  |  |

| *First Name and Middle Initial(s) | *Last Name | *Suffix (eg, Jr, III) | Academic Degrees | Institution                           | Location (city, state/province) | Country | Role or Contribution, eg, chair, principal investigator | Group (if more than 1 Group listed in the byline) and/or Subgroup (eg, Steering Committee) |  |  |  |  |  |  |
|-----------------------------------|------------|-----------------------|------------------|---------------------------------------|---------------------------------|---------|---------------------------------------------------------|--------------------------------------------------------------------------------------------|--|--|--|--|--|--|
| Jean-Denis                        | Moyer      |                       | Dr               | Beaujon University Hospital           | Clichy                          | France  | clinical investigator                                   | TraumaBase Group                                                                           |  |  |  |  |  |  |
|                                   |            |                       | Dr               |                                       |                                 | France  | clinical investigator                                   | TraumaBase Group                                                                           |  |  |  |  |  |  |
|                                   |            |                       | Dr               |                                       |                                 | France  | clinical investigator                                   | TraumaBase Group                                                                           |  |  |  |  |  |  |
| Olivier                           | Langeron   |                       | Dr               | Mondor University Hospital            | Créteil                         | France  | clinical investigator                                   | TraumaBase Group                                                                           |  |  |  |  |  |  |
| Marc                              | Leone      |                       | Dr               | Marseille University Hospital         | Marseille                       | France  | clinical investigator                                   | TraumaBase Group                                                                           |  |  |  |  |  |  |
| Julien                            | Pottecher  |                       | Dr               | Strasbourg University Hospital        | Strasbourg                      | France  | clinical investigator                                   | TraumaBase Group                                                                           |  |  |  |  |  |  |
| Jonathan                          | Portaz     |                       | Dr               | Wissembourg Hospital                  | Wissembourg                     | France  | clinical investigator                                   | TraumaBase Group                                                                           |  |  |  |  |  |  |
| Mathieu                           | Raux       |                       | Dr               | Pitié-Salpêtrière University Hospital | Strasbourg                      | France  | clinical investigator                                   | TraumaBase Group                                                                           |  |  |  |  |  |  |
| Marion                            | Scotto     |                       | Dr               | Bordeaux University Hospital          | Bordeaux                        | France  | clinical investigator                                   | TraumaBase Group                                                                           |  |  |  |  |  |  |
| Mathieu                           | Willig     |                       | Dr               | Dijon University Hospital             | Dijon                           | France  | clinical investigator                                   | TraumaBase Group                                                                           |  |  |  |  |  |  |
| Alexia                            | Hardy      |                       | Dr               | Valenciennes Hospital                 | Valenciennes                    | France  | clinical investigator                                   | TraumaBase Group                                                                           |  |  |  |  |  |  |
